# Supplementary material for: Disparities in Mortality and Cardiovascular Events by Income and Blood Pressure Levels Among Patients With Hypertension in South Korea
Source: PubMed Central journal article supplement — J Am Heart Assoc. 2021 Mar 15;10(7):e018446. doi: 10.1161/JAHA.120.018446 (PMC8174369; doi:10.1161/jaha.120.018446), 2021-03-15
Supplement: JAH3-10-e018446-s001.pdf [file JAH3-10-e018446-s001.pdf]

## **SUPPLEMENTAL MATERIAL**

**Table S1. South Korea's 2018 National Health Insurance Statistics for household insurance premiums by the National Health Insurance Service.**

| Premium quintile | Number of Households | Average premium: won(dollar)/months | Number of population |
|------------------|----------------------|-------------------------------------|----------------------|
| Sum              | 24,748,873           | 101,606 (93.05)                     | 49,562,166           |
| 1st              | 1,237,443            | 16,557 (15.16)                      | 1,814,442            |
| 2nd              | 1,237,443            | 27,037 (24.76)                      | 1,955,041            |
| 3rd              | 1,237,444            | 33,176 (30.38)                      | 1,976,086            |
| 4th              | 1,237,444            | 37,291 (34.15)                      | 1,924,347            |
| 5th              | 1,237,444            | 38,964 (35.68)                      | 1,935,777            |
| 6th              | 1,237,443            | 41,565 (38.06)                      | 1,928,656            |
| 7th              | 1,237,444            | 45,693 (41.84)                      | 1,978,637            |
| 8th              | 1,237,444            | 50,459 (46.21)                      | 2,032,583            |
| 9th              | 1,237,443            | 56,771 (51.99)                      | 2,100,568            |
| 10th             | 1,237,445            | 64,946 (59.47)                      | 2,200,270            |
| 11th             | 1,237,443            | 73,407 (67.22)                      | 2,260,176            |
| 12th             | 1,237,443            | 83,481 (76.45)                      | 2,388,702            |
| 13th             | 1,237,444            | 94,238 (86.30)                      | 2,532,407            |
| 14th             | 1,237,444            | 106,477 (97.51)                     | 2,651,569            |
| 15th             | 1,237,444            | 121,119 (110.91)                    | 2,834,906            |
| 16th             | 1,237,443            | 138,802 (127.11)                    | 3,018,399            |
| 17th             | 1,237,444            | 161,051 (147.48)                    | 3,202,745            |
| 18th             | 1,237,444            | 190,327 (174.29)                    | 3,480,502            |

|      |           |                  |           |
|------|-----------|------------------|-----------|
| 19th | 1,237,443 | 232,961 (213.33) | 3,641,281 |
| 20th | 1,237,444 | 417,793 (382.59) | 3,705,072 |

**Table S2. Baseline characteristics of the study population according to income level, stratified by sex.**

| Income                               | Men          |              |              |              | P value | Women        |              |              |              | P value |
|--------------------------------------|--------------|--------------|--------------|--------------|---------|--------------|--------------|--------------|--------------|---------|
|                                      | Q1, highest  | Q2           | Q3           | Q4           |         | Q1, highest  | Q2           | Q3           | Q4           |         |
| Number of patients (%)               | 71570 (34.3) | 54005 (25.9) | 41624 (20.0) | 41176 (21.8) | <0.0001 | 91777 (44.0) | 65248 (31.3) | 50769 (24.4) | 63190 (30.3) | <0.0001 |
| Age (years)                          | 58 (50-68)   | 56 (46-66)   | 56 (46-64)   | 59 (52-66)   | <0.0001 | 64 (55-70)   | 60 (54-68)   | 58 (52-66)   | 58 (50-66)   | <0.0001 |
| Blood pressure (mmHg)                |              |              |              |              | <0.0001 |              |              |              |              | <0.0001 |
| Systolic blood pressure              | 133.1 ± 12.0 | 133.8 ± 12.3 | 134.1 ± 12.6 | 135.0 ± 12.7 |         | 131.9 ± 85.0 | 131.9 ± 13.2 | 131.7 ± 13.5 | 131.8 ± 13.2 |         |
| Diastolic blood pressure             | 82.3 ± 7.8   | 82.9 ± 8.0   | 83.1 ± 8.2   | 83.1 ± 8.1   |         | 80.0 ± 7.9   | 80.5 ± 8.0   | 80.7 ± 8.1   | 80.8 ± 8.0   |         |
| Smoking (%)                          |              |              |              |              | <0.0001 |              |              |              |              | <0.0001 |
| Never                                | 28693 (40.1) | 20034 (37.1) | 14448 (34.7) | 15259 (37.1) |         | 89585 (97.6) | 62964 (96.5) | 48292 (95.1) | 60344 (95.5) |         |
| Past                                 | 25418 (35.5) | 16927 (31.3) | 12336 (29.6) | 12056 (29.3) |         | 775 (0.8)    | 729 (1.1)    | 741 (1.5)    | 753 (1.2)    |         |
| Current                              | 17459 (24.4) | 17044 (31.6) | 14840 (35.7) | 13861 (33.7) |         | 1417 (1.5)   | 1555 (2.4)   | 1736 (3.4)   | 2093 (3.3)   |         |
| Physical activity, times/week (%)    |              |              |              |              | <0.0001 |              |              |              |              | <0.0001 |
| 0                                    | 29915 (41.8) | 24810 (45.9) | 19765 (47.5) | 20027 (48.6) |         | 54304 (59.2) | 40066 (61.4) | 31691 (62.4) | 39072 (61.8) |         |
| 1-2                                  | 12637 (17.7) | 9725 (18.0)  | 7471 (17.9)  | 6599 (16.0)  |         | 11256 (12.3) | 7823 (12.0)  | 6411 (12.6)  | 8070 (12.8)  |         |
| 3-4                                  | 10496 (14.7) | 7395 (13.7)  | 5372 (12.9)  | 5212 (12.7)  |         | 10014 (10.9) | 6572 (10.1)  | 4852 (9.6)   | 6123 (9.7)   |         |
| 5-6                                  | 7669 (10.7)  | 5013 (9.3)   | 3772 (9.1)   | 3771 (9.2)   |         | 7029 (7.7)   | 4682 (7.2)   | 3340 (6.6)   | 4337 (6.9)   |         |
| 7                                    | 10853 (15.2) | 7062 (13.1)  | 5244 (12.6)  | 5567 (13.5)  |         | 9174 (10.0)  | 6105 (9.4)   | 4475 (8.8)   | 5588 (8.8)   |         |
| Alcohol consumption, times/week (%)  |              |              |              |              | 0.128   |              |              |              |              | <0.0001 |
| 0                                    | 28836 (40.3) | 20942 (38.8) | 16099 (38.7) | 17103 (41.5) |         | 82425 (89.8) | 56870 (87.2) | 42655 (84.0) | 52806 (83.6) |         |
| <1                                   | 13172 (18.4) | 9870 (18.3)  | 7494 (18.0)  | 6842 (16.6)  |         | 5642 (6.1)   | 4811 (7.4)   | 4538 (8.9)   | 6082 (9.6)   |         |
| 1-2                                  | 18969 (26.5) | 14679 (27.2) | 11601 (27.9) | 10934 (26.6) |         | 2721 (3.0)   | 2672 (4.1)   | 2679 (5.3)   | 3348 (5.3)   |         |
| 3-4                                  | 5824 (8.1)   | 4602 (8.5)   | 3477 (8.4)   | 3379 (8.2)   |         | 450 (0.5)    | 428 (0.7)    | 449 (0.9)    | 476 (0.8)    |         |
| ≥5                                   | 4769 (6.7)   | 3912 (7.2)   | 2953 (7.1)   | 2918 (7.1)   |         | 539 (0.6)    | 467 (0.7)    | 448 (0.9)    | 478 (0.8)    |         |
| Body mass index (kg/m <sup>2</sup> ) | 24.9 ± 3.0   | 25.0 ± 3.2   | 25.0 ± 3.3   | 24.8 ± 3.2   | <0.0001 | 24.8 ± 3.3   | 25.0 ± 3.4   | 25.0 ± 3.5   | 24.9 ± 3.5   | 0.001   |
| <18.5                                | 1010 (1.4)   | 833 (1.5)    | 674 (1.6)    | 746 (1.8)    |         | 1626 (1.8)   | 1171 (1.8)   | 1012 (2.0)   | 1227 (1.9)   |         |
| 18.5–22.9                            | 16584 (23.2) | 12832 (23.8) | 10558 (25.4) | 10851 (26.4) |         | 25728 (28.0) | 17389 (26.7) | 13750 (27.1) | 17403 (27.5) |         |
| 23.0–24.9                            | 19703 (27.5) | 14246 (26.4) | 10728 (25.8) | 10792 (26.2) |         | 23171 (25.2) | 15786 (24.2) | 11970 (23.6) | 15376 (24.3) |         |
| ≥25.0                                | 34273 (47.9) | 26094 (48.3) | 19664 (47.2) | 18787 (45.6) |         | 41252 (44.9) | 30902 (47.4) | 24037 (47.3) | 29184 (46.2) |         |
| Fasting serum glucose (mg/dL)        | 107.6 ± 30.0 | 108.0 ± 33.2 | 108.4 ± 34.6 | 110.1 ± 36.5 | <0.0001 | 102.9 ± 26.9 | 103.5 ± 27.9 | 103.3 ± 28.0 | 103.1 ± 28.9 | 0.228   |

|                                 |              |              |              |              |         |              |              |              |              |         |
|---------------------------------|--------------|--------------|--------------|--------------|---------|--------------|--------------|--------------|--------------|---------|
| <100.0                          | 34458 (48.1) | 26644 (49.3) | 20477 (49.2) | 19592 (47.6) |         | 53396 (58.2) | 37540 (57.5) | 29507 (58.1) | 37067 (58.7) |         |
| 100.0–125.9                     | 26044 (36.4) | 19004 (35.2) | 14531 (34.9) | 14420 (35.0) |         | 28336 (30.9) | 20162 (30.9) | 15490 (30.5) | 19148 (30.3) |         |
| ≥126.0                          | 11068 (15.5) | 8357 (15.5)  | 6616 (15.9)  | 7164 (17.4)  |         | 10045 (10.9) | 7546 (11.6)  | 5772 (11.4)  | 6975 (11.0)  |         |
| Total cholesterol (mg/dL)       | 189.8 ± 39.0 | 191.7 ± 42.1 | 191.2 ± 38.3 | 190.6 ± 39.9 | 0.001   | 201.3 ± 42.0 | 202.3 ± 43.1 | 202.2 ± 41.2 | 202.3 ± 41.1 | <0.0001 |
| <200.0                          | 44924 (62.8) | 33015 (61.1) | 25616 (61.5) | 25652 (62.3) |         | 46796 (51.0) | 32830 (50.3) | 25702 (50.6) | 31757 (50.3) |         |
| 200.0–239.9                     | 20239 (28.3) | 15594 (28.9) | 11747 (28.2) | 11538 (28.0) |         | 30930 (33.7) | 21864 (33.5) | 16761 (33.0) | 21255 (33.6) |         |
| ≥240.0                          | 6407 (9.0)   | 5396 (10.0)  | 4261 (10.2)  | 3986 (9.7)   |         | 14051 (15.3) | 10554 (16.2) | 8306 (16.4)  | 10178 (16.1) |         |
| Diabetes mellitus (%)           | 8404 (11.7)  | 5992 (11.1)  | 4599 (11.0)  | 5127 (12.5)  | 0.020   | 10445 (11.4) | 7405 (11.3)  | 5408 (10.7)  | 6038 (9.6)   | <0.0001 |
| Aspirin (%)                     | 20624 (28.8) | 13804 (25.6) | 9931 (23.9)  | 11029 (26.8) | <0.0001 | 23359 (25.5) | 15753 (24.1) | 11643 (22.9) | 14300 (22.6) | <0.0001 |
| Statin (%)                      | 9205 (12.9)  | 6302 (11.7)  | 4446 (10.7)  | 4774 (11.6)  | <0.0001 | 14088 (15.4) | 9355 (14.3)  | 6729 (13.3)  | 8260 (13.1)  | <0.0001 |
| Antihypertensive medication (%) | 35143 (49.1) | 25543 (47.3) | 19792 (47.5) | 21253 (51.6) | <0.0001 | 47178 (51.4) | 32632        | 24743 (48.7) | 31308 (49.5) | <0.0001 |

Data are expressed as mean ± standard deviation, median (interquartile range), or number (percentage).

**Figure S1. Risk of myocardial infarction and stroke for 16 groups, classified according to income and blood pressure levels.**

**A**

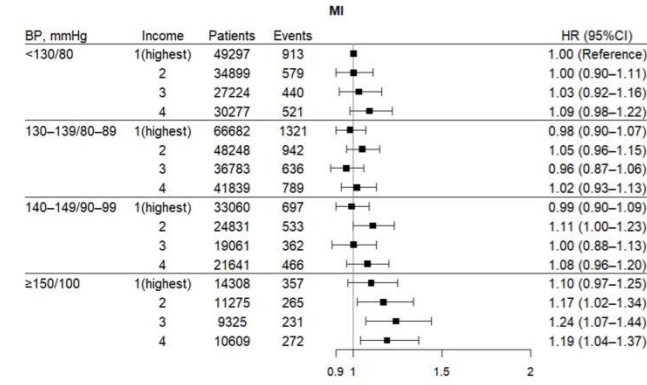

**B**

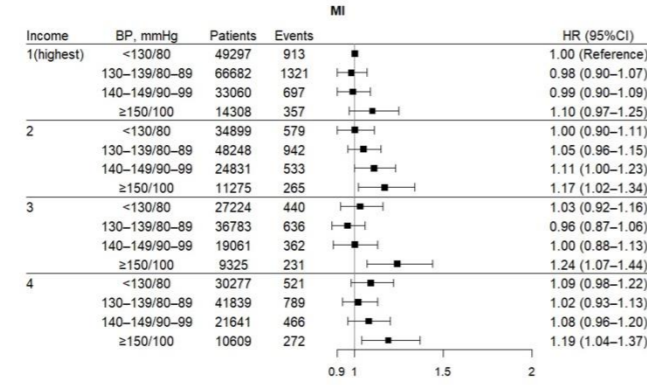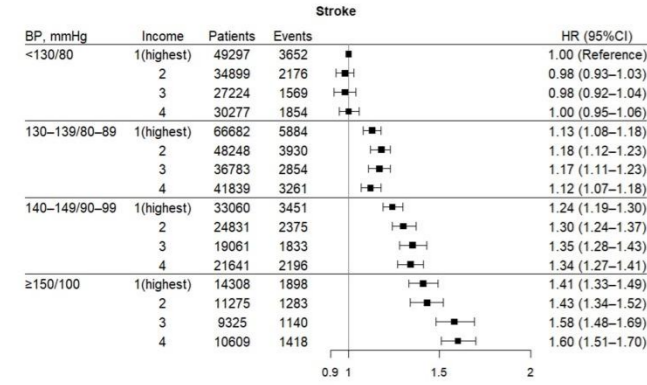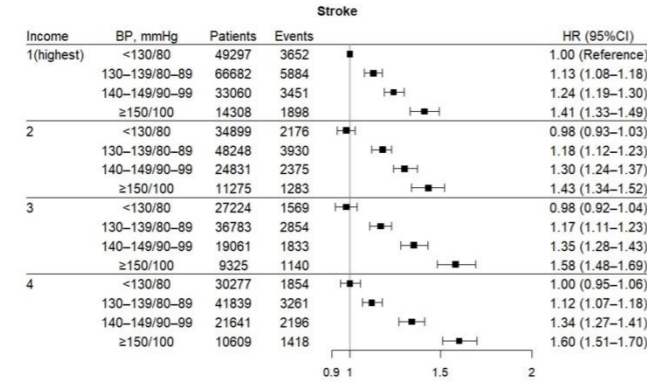

A Cox proportional hazard regression model adjusted for age, sex, BP, body mass index (BMI), smoking status, alcohol consumption, physical activity, fasting glucose, total cholesterol, and aspirin or statin use. The X-axis refers to HR (95% CI) and HR itself (not log[HR]) was plotted. HR indicates hazard ratio.
